# Supplementary material for: Psychisches Wohlbefinden als Prädiktor der frühen körperlichen Gebrechlichkeit
Source: Springer Nature journal article supplement (doi:10.1007/s41975-023-00322-x), 2023-11-08
Supplement: MOESM1 [file 26281584]

Ergänzende Tabelle 1. Mediationsanalysen des psychischen Wohlbefindens auf die Greifkraft durch chronischen Stress.

|  |  | **M: Chronischer Stress** | | |  | **Y: Greifkraft** | | |
| --- | --- | --- | --- | --- | --- | --- | --- | --- |
| **Gesamtstichprobe** |  |  | | |  |  | | |
|  |  | **Coeff.** | **(SE)** | **p** |  | **Coeff.** | **(SE)** | **p** |
| X: Psychisches Wohlbefinden | a: | -.2689 | (.0206) | < .001 | c`: | .0840 | (.0802) | .296 |
| M: Chronischer Stress | - | - | - | - | b: | .455 | (.1591) | .004 |
| Konstante | b0: | 17.1778 | (2.3016) | <.001 | b0: | 23.7524 | (8.0376) | .003 |
| Totaler Effekt: Effekt= -.0385, *p*= .632; Indirekter Effekt durch chronischen Stress: Effekt= -.1224, Boot SE= .0442, 95% CI -.2091, -.0366 | | | | | | | | |
| **Nur Frauen** |  |  | | |  |  | | |
|  |  | Coeff. | (SE hc3) | p |  | Coeff. | (SE) | p |
| X: Psychisches Wohlbefinden | a: | -.2438 | (.0286) | < .001 | c`: | . 2287 | (.0975) | .02 |
| M: Chronischer Stress | - | - | - | - | b: | .1238 | (.1866) | .051 |
| Konstante | b0: | 12.4528 | (3.0362) | <.001 | b0: | 23.7524 | (8.0376) | .003 |
| Totaler Effekt: Effekt = .1985, *p*= .0267; Indirekter Effekt durch chronischen Stress: Effekt= -.0302, Boot SE= .0458, 95% CI -.1229, .0592 | | | | | | | | |
| **Nur Männer** |  |  | | |  |  | | |
|  |  | Coeff. | (SE hc3) | p |  | Coeff. | (SE) | p |
| X: Psychisches Wohlbefinden | a: | -.3147 | (.0314) | < .001 | c`: | .5151 | (.1121) | <.001 |
| M: Chronischer Stress | - | - | - | - | b: | .3474 | (.1714) | .04 |
| Konstante | b0: | 19.8207 | (3.5237) | <.001 | b0: | 29.2928 | (9.4648) | .002 |
| Totaler Effekt: Effekt = .4058, *p<* .001; Indirekter Effekt durch chronischen Stress: Effekt= -.1093, Boot SE= .0532, 95% CI -.2135, -.0028 | | | | | | | | |

Anmerkung. Coeff= Regressionskoeffizient; SE= Heteroskedastizität konsistenter Standardfehler;X= Prädiktor; M= Mediator; Y= Kriterium.

Ergänzende Tabelle 2. Mediationsanalysen des psychischen Wohlbefindens auf den LBMI durch chronischen Stress.

|  |  | **M: Chronischer Stress** | | |  | **Y: LBMI** | | |
| --- | --- | --- | --- | --- | --- | --- | --- | --- |
| **Gesamtstichprobe** |  |  | | |  |  | | |
|  |  | **Coeff.** | **(SE)** | **p** |  | **Coeff.** | **(SE)** | **p** |
| X: Psychisches Wohlbefinden | a: | -.2694 | (2.322) | <.001 | c`: | -.0626 | (.0144) | <.001 |
| M: Chronischer Stress | - | - | - | - | b: | .0636 | (.0270) | .019 |
| Konstante | b0: | 17.359 | (2.3221) | <.001 | b0: | 16.6947 | (1.338) | <.001 |
| Totaler Effekt: Effekt= -.0797, *p*<.001; Indirekter Effekt durch chronischen Stress: Effekt= -.0171, Boot SE= .0074, 95% CI -.0318, -.0030 | | | | | | | | |
| **Nur Frauen** |  |  | | |  |  | | |
|  |  | Coeff. | (SE) | p |  | Coeff. | (SE) | p |
| X: Psychisches Wohlbefinden | a: | -.2452 | (.0289) | <.001 | c`: | -.0068 | (.0159) | .669 |
| M: Chronischer Stress | - | - | - | - | b: | .0444 | (.0267) | .098 |
| Konstante | b0: | 13.0647 | (3.0721) | <.001 | b0: | 17.4838 | (1.3508) | <.001 |
| Totaler Effekt: Effekt = -.0177, *p*=.22; Indirekter Effekt durch chronischen Stress: Effekt = -.0109, Boot SE= .0065, 95% CI -.0242, .0020 | | | | | | | | |
| **Nur Männer** |  |  | | |  |  | | |
|  |  | Coeff. | (SE) | p |  | Coeff. | (SE) | p |
| X: Psychisches Wohlbefinden | a: | -.3150 | (.0314) | <.001 | c`: | .0307 | (.0182) | .093 |
| M: Chronischer Stress | - | - | - | - | b: | .0739 | (.0285) | .01 |
| Konstante | b0: | 19.6953 | (3.5496) | <.001 | b0: | 17.8479 | (1.4836) | <.001 |
| Totaler Effekt: Effekt = .0074, *p*= .63; Indirekter Effekt durch chronischen Stress: Effekt = -.0233, Boot SE= .0090, 95% CI -.0412, -.0061 | | | | | | | | |

Anmerkung. Coeff= Regressionskoeffizient; SE= Heteroskedastizität konsistenter Standardfehler;X= Prädiktor; M= Mediator; Y= Kriterium.
